# Supplementary material
Source: ML conference proceedings conference paper supplement (https://proceedings.neurips.cc/paper_files/paper/2023/hash/12bcf58a1c09a0fcb5310f3589291ab4-Abstract.html)
Supplement: Supplementary file 1 [file 12bcf58a1c09a0fcb5310f3589291ab4-Supplemental-Conference.pdf]

---

# Offline Reinforcement Learning for Mixture-of-Expert Dialogue Management

---

Anonymous Author(s)

Affiliation

Address

email

## Abstract

1 Reinforcement learning (RL) has shown great promise for developing dialogue  
2 management (DM) agents that are non-myopic, conduct rich conversations, and  
3 maximize overall user satisfaction. Despite recent developments in RL and language  
4 models (LMs), using RL to power conversational chatbots remains challenging,  
5 in part because RL requires online exploration to learn effectively, whereas  
6 collecting novel human-bot interactions can be expensive and unsafe. This issue is  
7 exacerbated by the combinatorial action spaces facing these algorithms, as most  
8 LM agents generate responses at the word level. We develop a variety of RL algo-  
9 rithms, specialized to dialogue planning, that leverage recent Mixture-of-Expert  
10 Language Models (MoE-LMs)—models that capture diverse semantics, generate  
11 utterances reflecting different intents, and are amenable for multi-turn DM. By  
12 exploiting MoE-LM structure, our methods significantly reduce the size of the  
13 action space and improve the efficacy of RL-based DM. We evaluate our methods  
14 in open-domain dialogue to demonstrate their effectiveness w.r.t. the diversity of  
15 intent in generated utterances and overall DM performance.

## 16 1 Introduction

17 Natural Language Processing (NLP) has made significant strides in recent years, notably in the  
18 field of language generation. Thanks to advances in language modeling, particularly with the use  
19 of transformer Vaswani et al. (2017), NLP models can now generate human-like text that is often  
20 difficult to distinguish from text written by a person. However, despite these advancements, these  
21 models still fall short when it comes to having rich conversations. Current NLP models lack effective  
22 dialogue management, as these models are good at generating individual sentences, but struggle with  
23 maintaining coherent and engaging conversations. Whereas, most compelling conversations generally  
24 span numerous topics, are rather open-ended, and often have an underlying goal (e.g., customer  
25 success, task completion, recommendation). This requires dialogue agents to understand the context  
26 of the conversation and respond appropriately while maintaining the ability to achieve goals.

27 *Reinforcement learning (RL)* is a natural approach for optimizing a dialogue management agent’s pol-  
28 icy. Earlier work on RL-based dialogue systems relies on specific, hand-crafted semantic states (Levin  
29 and Pieraccini, 1997; Singh et al., 2002; Walker, 2000) or partially observable belief states (Williams  
30 and Young, 2007; Young et al., 2010), in which case the agent encodes conversations and chooses the  
31 best structured dialogue action at each turn. Applications include relational reasoning (Shah et al.,  
32 2018), task completion (Shi and Yu, 2018), and query fulfillment (Serban et al., 2017), whose action  
33 spaces are structured enough to be represented by hand-crafted features. To handle more complex  
34 dialogues, recent approaches use language models to extract semantic representations from conver-  
35 sation histories, treat these representations as dialogue states, and apply RL to learn a word-level  
36 generative DM agent (Jaques et al., 2019; Li et al., 2016, 2017; Shin et al., 2020).

37 However, unlike supervised learning approaches, where one can train imitation agents with offline  
38 conversation data, RL DM algorithms require online exploration to learn effectively. Unfortunately,

39 constant interactions with real users is often expensive and time-consuming. While one can potentially  
 40 address the DM problem using *offline* RL, issues such as model exploitation leading to distribution  
 41 shift on the state and action space, when training on static datasets are of paramount concern  
 42 (Levine et al., 2020). Moreover, the myriad variation of language makes incorporating all possible  
 43 conversation histories and bot utterances into the state and action spaces of an RL formulation of the  
 44 DM problem impractical due to the combinatorics at play. As a result, naively applying RL to DM  
 45 may result in poorly-performing agents that generate incomprehensible utterances (Zhao et al., 2019).

46 We tackle the issues above, related to the use of offline RL in DM systems, by leveraging recent  
 47 advances in Mixture-of-Expert Language Models (MoE-LMs) (Chow et al., 2022). Specifically, we  
 48 develop a suite of offline RL algorithms specialized in dialogue planning that exploit the structure  
 49 of MoE-LMs. Our methods consist of three main components: **1**) a primitive LM which, using a  
 50 probabilistic encoder and decoder, is capable of generating diverse semantic intents **1**) a primitive  
 51 LM that uses a probabilistic encoder-decoder pair to generate sentences with diverse semantics and  
 52 intents ; **2**) a number of *specialized* expert LMs, each of which generates utterances corresponding to  
 53 a specific intent; and **3**) a compositional dialogue manager (DM) that, at each turn, given the encoded  
 54 conversation history and a set of candidate utterance suggested by the experts, selects one candidate  
 55 utterance for the DM agent to execute as a response to the conversation until now.

56 Our contributions to offline RL adapted for MoE-based DM agents are four-fold. First, we exploit the  
 57 hierarchical structure of MoE-LMs, allowing our offline RL methods to work with a significantly  
 58 smaller, finite action space, hence making the RL problem more tractable. Second, by leveraging pre-  
 59 trained MoE-LMs—which generate sensible utterances—and offline RL *prior regularization*—which  
 60 matches our DM’s behaviors with that of the primitive LM—our RL algorithms focus on higher-level  
 61 dialogue planning, and are more data-efficient than standard RL methods by allowing language  
 62 fluency to be handled by the MoE-LMs. Third, by using the diverse semantic representations of  
 63 MoE-LMs, our methods operate at the sentence embedding space and have much simpler critic  
 64 and actor updates. This circumvents the word-level credit-assignment issue that is particularly  
 65 challenging in long conversations (Saleh et al., 2020). Fourth, in contrast to the findings of Verma  
 66 et al. (2022), where offline RL agents tend to lack utterance diversity (due to potential reward hacking  
 67 and optimization of a single objective), our MoE-based DM agents are adept at generating utterances  
 68 reflecting different intents by design.

69 We begin with a brief introduction of LMs, the MoE-LM architecture, and the use of MDPs in DM  
 70 in Section 2. We then describe the pre-training procedure for MoE-LMs—which encode diverse  
 71 semantics and generate fluent utterances capturing specific intents—in Section 3. We derive four  
 72 state of the art (SOTA) offline RL algorithms for training MoE-LMs in Section 4, and three MoE-LM  
 73 specialized offline RL algorithms in Section 5. Finally, in Section 6, we demonstrate the effectiveness  
 74 of our algorithms in open-domain dialogues w.r.t. their ability to generate utterances with diverse  
 75 intents and overall DM performance.

## 76 2 Preliminaries

77 **Language Models (LMs)** In this work, we employ seq2seq LMs Sutskever et al. (2014) to generate  
 78 the next utterances in a dialogue. We assume access to a dataset of the form  $\mathcal{D} = \{(\mathbf{X}^{(k)}, Y^{(k)})\}_{k=1}^{|\mathcal{D}|}$ ,  
 79 where each  $\mathbf{X}$  is an  $L$ -turn conversation history  $\mathbf{X} = \{X_l\}_{l=0}^{L-1}$ , wherein  $X_l$  is the utterance in a  
 80 conversation at turn  $l$ , and  $Y$  is the next utterance. Let  $N_{\mathbf{X}}$  be an upper-bound on the length (number of  
 81 tokens) of each utterance  $X_l$  in  $\mathbf{X}$ <sup>1</sup>. The role of an LM is to predict the probability of the next utterance,  
 82  $Y$ , consisting of  $N$  tokens, conditioned on the conversation history,  $\mathbf{X}$ ; i.e.,  $\Pr(Y = \{y_n\}_{n=1}^N | \mathbf{X})$ .  
 83 In the transformer architecture (Wolf et al., 2019), a LM first encodes the conversation history  $\mathbf{X}$   
 84 using an encoder  $\Phi$  to a  $(L \times N_{\mathbf{X}})$ -length sequence of embeddings  $\{(z_{l,0}, \dots, z_{l,N_{\mathbf{X}}-1})\}_{l=0}^{L-1}$ , where  
 85 each  $z_{l,n}$  is a vector in the latent space induced by the encoder  $\Phi$ . For notational convenience,  
 86 we concatenate these embeddings into a single embedding  $z \in \mathcal{Z} \subseteq \mathbb{R}^d$  where  $d$  is the overall  
 87 dimension of the latent space. The next utterance  $\hat{Y} = \{\hat{y}_n\}_{n=1}^N$  is then sampled, token-by-token,  
 88 from a decoder  $\Psi$ ; i.e.,  $\hat{Y} \sim \Psi(\cdot | z) := \prod_{n=1}^N \Psi(\hat{y}_n | \hat{y}_0, \dots, \hat{y}_{n-1}; z)$ , where  $\hat{y}_0$  is a fixed initial  
 89 (start-of-sentence) token (Chien and Kuo, 2019), and the latent state is denoted as  $z = \Phi(\mathbf{X})$ .

90 **Markov Decision Processes (MDPs)** have been used to model dialogue management problems in a  
 91 variety of settings (Li et al., 2016; Asadi and Williams, 2016; Jaques et al., 2019). In such MDPs,

<sup>1</sup>If the actual utterance  $X_l$  has fewer tokens than  $N_{\mathbf{X}}$ , remaining spaces in the utterance will be padded by a specific token and masked.

92 denoted by  $\mathcal{M} = (\mathcal{S}, \mathcal{A}, P, r, s_0, \gamma)$ , the state space  $\mathcal{S}$  represents the tokenized conversation history  
 93 and the initial state  $s_0 \in \mathcal{S}$  is the initial user’s query. The action space  $\mathcal{A}$  is the tokenized language  
 94 space, with each action  $a \in \mathcal{A}$  representing one possible next utterance of the agent. The transition  
 95 kernel  $P$  models the distribution over the user’s response to the action taken by the agent (bot) and  
 96 current conversational context. Finally, the reward function  $r$  measures the user’s satisfaction as a  
 97 function of the conversation upto the most recent step. In these MDPs, we can think of the LM as  
 98 a policy that maps conversation histories to next utterances. The goal is to find a policy  $\pi^*$  with  
 99 maximum expected discounted return, i.e.,  $\pi^* \in \arg \max_{\pi} J_{\pi} := \mathbb{E}[\sum_{k=0}^{\infty} \gamma^k r_k | P, s_0, \pi]$ . Note that  
 100 the size of the tokenized state and action spaces grow exponentially with the vocabulary size. This  
 101 makes it intractable to solve MDPs of this type even for a medium-size vocabulary.

102 **Mixture-of-expert Language Models (MoE-LMs).** (Chow et al., 2022) recently demonstrated  
 103 promising results using MoE-LMs to enrich a bot’s utterances and improve DM (see Figure 1 for an  
 104 architecture sketch). These results were achieved mainly due to (i) learning a language representation  
 105 (called as *primitive discovery*) that captures different semantics, (ii) a machinery (*expert construction*)  
 106 that embeds different intents into sub-models of this LM, so that they can behave appropriately when  
 107 prompted, and (iii) a compositional dialogue manager module that comprehends the conversation and  
 108 determines which response deems most appropriate.

109 For *primitive discovery*, one first learns a language model  $\text{LM}_0 = (\Phi, \mathcal{G}_0, \Psi)$  consisting  
 110 of a *stochastic encoder*  $\mathcal{G}_0 \circ \Phi$ , which is composed of an encoder  $\Phi$  that maps tokenized  
 111 conversation histories  $\mathbf{X}$  to a latent space  $\mathcal{Z} \subseteq \mathbb{R}^d$  a Gaussian distribution  $\mathcal{G}_0(z'|z) :=$   
 112  $\mathcal{N}(\mu_0(z), \sigma_0^2(z)\mathbf{I}_{d \times d})$ , and a decoder  $\Psi$ , which predicts the next utterance  $\hat{Y}_0$  (token-by-token)  
 113 conditioned on the point  $z'$  sampled from the latent distribution  $\Psi(\hat{Y}_0|z')$ , where  $z' \sim \mathcal{G}_0(\cdot|z)$ .  
 114 Let  $\text{LM}_0(Y|\mathbf{X}) := \mathbb{E}_{z' \sim \mathcal{G}_0(\cdot|z), z = \Phi(\mathbf{X})}[\Psi(Y|z')]$  denote the *primitive*, which predicts the next utter-  
 115 ance accurately and also has strong generalization in  $\mathcal{Z}$  over a diverse set of possible utterances.  
 116

117 Given a primitive  $\text{LM}_0 = (\Phi, \mathcal{G}_0, \Psi)$ , the algorithm  
 118 learns  $m$  expert distributions  $\{\mathcal{G}_i\}_{i=1}^m$ , each defined as  
 119  $\mathcal{G}_i(z'|z) = \mathcal{N}(\mu_i(z), \sigma_i^2(z)\mathbf{I}_{d \times d})$ , where each  $\mathcal{G}_i$   
 120 corresponds to a personality and generates samples in spec-  
 121 ific parts of the latent space  $\mathcal{Z}$ . This results in  $m$  LMs,  
 122  $\{\text{LM}_i\}_{i=1}^m$ ,  $\text{LM}_i = (\Phi, \mathcal{G}_i, \Psi)$ , each serving as an *expert*  
 123 that generates one or more candidate next utterances  $\hat{Y}_i$   
 124 that are relevant to the conversation  $\mathbf{X}$ , and also compati-  
 125 ble with its respective personality and intent. For dialogue  
 126 management, the compositional DM  $\mu$  takes as input the  
 127 encoded conversation history  $z = \Phi(\mathbf{X})$  and candidate action utterances generated by the experts  
 128  $\{\hat{Y}_i\}_{i=0}^m$ , and selects one of them to execute, i.e.,  $Y \sim \mu(\cdot | z, \{\hat{Y}_i\}_{i=0}^m)$ . Given the state  $s = \mathbf{X}$  and  
 129 action  $a = Y$ , the MoE-LM policy that optimizes the DM MDP can be expressed as

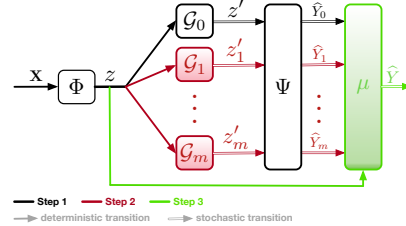

Figure 1: MoE-LM Architecture.

127 encoded conversation history  $z = \Phi(\mathbf{X})$  and candidate action utterances generated by the experts  
 128  $\{\hat{Y}_i\}_{i=0}^m$ , and selects one of them to execute, i.e.,  $Y \sim \mu(\cdot | z, \{\hat{Y}_i\}_{i=0}^m)$ . Given the state  $s = \mathbf{X}$  and  
 129 action  $a = Y$ , the MoE-LM policy that optimizes the DM MDP can be expressed as

$$\pi_{\text{MoE}}(a|s) = \int_{\{\hat{a}_i, z'_i\}_{i=0}^m} \mu(a|\Phi(s), \{\hat{a}_i\}_{i=0}^m) \prod_{i=0}^m d\Psi(\hat{a}_i|z'_i) d\mathcal{G}_i(z'_i|\Phi(x)). \quad (1)$$

### 130 3 Warmstarting the MoE-LM

131 The MoE-LM approach reformulates the RL dialogue management problem with much smaller state  
 132 and action spaces and focuses on optimizing the specific goal of the conversation task (as candidate  
 133 utterances are separately optimized to follow particular bot-based characteristics/intents). Recall  
 134 that the DM is a policy conditioned on both the latent state and the actions suggested by the experts.  
 135 Before introducing the different RL methods for DM (Section 4 and 5), in the following we outline  
 136 (i) the learning of diverse semantics (primitive LM) for conversation histories, which allows the agent  
 137 to generate a wide variety of utterances, and (ii) the construction of specialized LMs (experts), which  
 138 generate utterances of different intents.

139 Following from the primitive discovery procedure in Chow et al. (2022), the primitive LM,  $\text{LM}_0$ , is  
 140 learned by solving a KL-constrained optimization problem that aims at capturing diverse semantics:

$$\min_{(\Phi, \mathcal{G}_0, \Psi), \rho} \hat{\mathbb{E}}_{z' \sim \rho(\cdot|z, Y), z = \Phi(\mathbf{X})} [-\log \Psi(Y|z')] \quad \text{s.t.} \quad \hat{\mathbb{E}}_{z = \Phi(\mathbf{X})} [\text{KL}(\rho(z'|z, Y) || \mathcal{G}_0(z'|z))] \leq \epsilon_{\text{KL}}, \quad (2)$$

141 where  $\widehat{\mathbb{E}}$  is the empirical expectation over  $(\mathbf{X}, Y)$  in the dataset  $\mathcal{D}$ ,  $\rho$  is a distribution over the latent  
 142 space conditioned on the encoded conversation history  $z$  and the target utterance  $Y$ , and  $\epsilon_{\text{KL}}$  is  
 143 a positive real-valued threshold. Using (2), we learn  $\text{LM}_0 = (\Phi, \mathcal{G}_0, \Psi)$  by maximizing the log-  
 144 likelihood of sentence  $Y$  for a context and latent generation, while enforcing consistency between the  
 145 latent variable  $z'$  predicted by  $\mathcal{G}_0(\cdot|z)$  and  $\rho(\cdot|z, Y)$  via the KL constraint. The distribution  $\rho(\cdot|z, Y)$   
 146 is a Gaussian  $\mathcal{N}(\mu_\rho(z, \Phi_\rho(Y)), \sigma_\rho^2(z, \Phi_\rho(Y))\mathbf{I}_{d \times d})$  in which  $\Phi_\rho$  is a pre-trained encoder for the  
 147 target utterance  $Y$ , and where the mean  $\mu_\rho(\cdot, \cdot)$  and the variance  $\sigma_\rho^2(\cdot, \cdot)$  are trainable models. In  
 148 practice, we implement the KL constraint in (2) as a penalty weighted by a chosen coefficient.

149 To complete the MoE framework, one needs to train a set of experts  $\text{LM}_i, \forall i \in \{1, \dots, m\}$ , with  
 150 each generating candidate utterances of different intents. By viewing each expert as a distribution of  
 151 particular behaviors in conversation data  $\mathcal{D}$ , we leverage the results in Chow et al. (2022) and adopt a  
 152 universal encoder-decoder  $(\Phi, \Psi)$  among all the experts. Therefore, each expert  $i$  is parameterized by  
 153 an arbitrary latent distribution that samples certain regions of the latent space  $\mathcal{Z}$ . Let  $\ell_i(\mathbf{X}, Y) \in \mathbb{R}$  be  
 154 a real-valued label that *characterizes* the intent of expert  $i \in \{1, \dots, m\}$ . We can think of  $\ell_i(\mathbf{X}, Y)$   
 155 as score assigned to  $Y$  resembling how strongly  $Y$  exhibits the trait expert  $i$  is meant to represent.  
 156 We train the latent distribution  $\mathcal{G}_i(z)$  of expert  $i$  by solving the problem

$$\min_{\mathcal{G}_i} \widehat{\mathbb{E}}_{z' \sim \mathcal{G}_i(\cdot|z), z = \Phi(\mathbf{X}), Y \sim \Psi(\cdot|z')} [-\ell_i(\mathbf{X}, Y)]. \quad (3)$$

157 Each expert is learned via *reward-maximization*, where  $\ell_i$  is treated like a reward signal w.r.t.  
 158 expert  $i$ , wherein the expert tries to maximize that intent-aligned reward. Note that there is a  
 159 correspondence of the above approach with contextual bandits (Chu et al., 2011), for which both  
 160 the context and action spaces are latent space  $\mathcal{Z}$ , and the bandit policy is the latent distribution  
 161  $\mathcal{G}_i$ . The choice of greedy reward maximization is to encourage a particular behavior in the expert’s  
 162 immediate utterance rather than trying to control future utterances. Long-term dialogue planning  
 163 is handled by the compositional dialogue manager. For example, with Gaussian experts  $\mathcal{G}_i, i \in$   
 164  $\{1, \dots, m\}$ , we can use the standard REINFORCE (Sutton et al., 1999a) algorithm where the model  
 165 parameters  $(\mu_i, \sigma_i)$  are updated in the following direction, where  $\alpha > 0$  is the learning rate  $-$   
 166  $\alpha \cdot \mathbb{E}_{z' \sim \mathcal{G}_i(\cdot|z), Y \sim \Psi(\cdot|z')} [\ell_i(\mathbf{X}, Y) \cdot \nabla_{\{\mu_i, \sigma_i\}} \log \mathbb{P}_{\mathcal{G}_i}(z'|z)]$ . To reduce the variance of these estimates,  
 167 we can also adopt the baseline reduction technique in (Greensmith et al., 2004).

## 168 4 RL for Mixture-of-Expert DM

169 Offline RL, in which the policy must be learned from the collected conversations  $\mathcal{D}$  (without  
 170 further online interactions), potentially allows RL DM methods to leverage the abundance of offline  
 171 conversational data for policy learning. Denote by  $(\mathbf{X}, Y, X_+) \sim \mathcal{D}$  a tuple sampled from the offline  
 172 conversation data  $\mathcal{D}$ , where  $X_+$  is the follow-up user response, and where  $s := \mathbf{X}, a := Y, r(X_+),$   
 173  $s_+ := (\mathbf{X}, Y, X_+)$  are the state, action, reward (w.r.t. the follow-up user response), and next state of  
 174 the MDP, respectively. One standard offline RL algorithm is  $Q$  learning (Watkins and Dayan, 1992)  
 175 which solves:  $\min_Q \mathbb{E}_{(s, a, r, s_+) \sim \mathcal{D}} [(r + \gamma \max_{a_+} Q(s_+, a_+) - Q(s, a))^2]$ .

176 However, with the large action space the inner maximization (also termed as greedification)  
 177  $\max_{a_+} Q(s_+, a_+)$  is generally computationally intractable. Furthermore, since one cannot ensure  
 178 that the optimal  $a_+^*$  is sampled from the same action distribution as in the offline RL dataset (an  
 179 issue worsened by the massive action set), such a co-variate shift in the sampling distribution can  
 180 cause an overestimation bias of the  $Q$  estimate. To alleviate these issues, we propose to leverage  
 181 the warm-started MoE LM (Sec. 3), where the diverse semantic representation and the expert LMs  
 182 are learned separately. This is crucial to make our offline RL DM problem tractable as the language  
 183 fluency is captured by the MoE-LM, while our RL-based DM focuses on higher-level planning  
 184 strategies. In the following, we describe how this can be achieved via different offline RL algorithms.

185 **Offline RL Methods for MoE LMs:** One approach to address the aforementioned offline RL issues is  
 186 *entropy regularization* (Haarnoja et al., 2018; Carta et al., 2021), which regularizes the greedification  
 187 step to ensure the learned policy is either diverse enough or close to the behavior (data-generation)  
 188 policy (e.g., with a Shannon entropy or a KL divergence between these policies). Recall that the  
 189 primitive LM  $(\Phi, \mathcal{G}_0, \Psi)$  models the utterance distribution in  $\mathcal{D}$ , and the state-action-reward-next-state  
 190 tuple of the DM MDP  $(s, a, r, s_+)$ . With the following latent states generated by the primitive LM:  
 191  $z = \Phi(s), z_a = \Phi((s, a)), z_+ = \Phi(s_+)$ , we define the latent conversation data  $\Phi(\mathcal{D})$  as a collection  
 192 of  $(z, z_a, r, z_+)$  tuples. With Shannon-entropy regularization we can utilize the *soft actor critic*  
 193 framework (Haarnoja et al., 2018) to develop RL updates for the *value function*  $V(z)$ , *state-action*  
 194 *value function*  $Q(z_a)$ , and *latent generator*  $\mathcal{G}(z'|z)$ , which is initialized with the primitive latent

195 expert  $\mathcal{G}_0$  that minimizes the following losses:

$$L_Q = \mathbb{E}_{(z, z_a, r, z_+) \sim \Phi(\mathcal{D})} [(r + \gamma V_{\text{tar}}(z_+) - Q(z_a))^2] \quad (4)$$

$$L_V = \mathbb{E}_{z \sim \Phi(\mathcal{D}), (\hat{a}, z') \sim \Psi \circ \mathcal{G}(\cdot | z)} [Q_{\text{tar}}(z_{\hat{a}}) - \alpha \log \mathcal{G}(z' | z) - V(z)]^2 \quad (5)$$

$$L_G = \mathbb{E}_{z \sim \Phi(\mathcal{D}), (\hat{a}, z') \sim \Psi \circ \mathcal{G}(\cdot | z)} [Q(z_{\hat{a}}) - \alpha \log \mathcal{G}(z' | z)], \quad (6)$$

196 where the critic  $Q$  and  $V$  take any encoded conversation histories as input and predict the correspond-  
 197 ing cumulative return;  $\alpha > 0$  is the entropy temperature;  $(V_{\text{tar}}, Q_{\text{tar}})$  are the target value networks;  
 198  $z' \sim \mathcal{G}(\cdot | z)$  is the latent sample generated by  $\mathcal{G}$ ;  $\hat{a} \sim \Psi(z')$  is the utterance sampled from  $\Psi \circ \mathcal{G}$ ; and  
 199  $z_{\hat{a}} = \Phi(\mathbf{X}, \hat{a})$  is the corresponding latent state.

200 From a *hierarchical RL* viewpoint (Sutton et al., 1999b; Saleh et al., 2020), the latent generator  
 201 behaves like a high-level policy, whose latent sample  $z'$  is used to generate a bot utterance via  
 202  $\Psi$ -decoding (with the primitive decoder  $\Psi$  acting as the low-level policy). Extending the above RL  
 203 updates to the case of relative-entropy (KL) regularization can be straightforwardly done by replacing  
 204 the term  $\log \mathcal{G}(z' | z)$  with  $\log(\mathcal{G}(z' | z) / \mathcal{G}_0(z' | z))$ , since the primitive LM  $(\Phi, \mathcal{G}_0, \Psi)$  approximates  
 205 the behavior policy and the encoder-decoder pair  $(\Phi, \Psi)$  is shared among the DMs.

206 Multiple techniques in value-function parameterization have been employed to tackle the overesti-  
 207 mation bias. Fujimoto et al. (2018) proposed maintaining two  $Q$  functions, and a *dual Q* function  
 208 chooses the minimum value between them to avoid overestimation. Jaques et al. (2019) applies  
 209 dropout in the  $Q$  function to maintain an *ensemble* of  $Q$  values, and outputs the minimum value to  
 210 avoid overestimation. By utilizing these methods within the MoE-LM framework, we can propose the  
 211 following variants of offline RL algorithms: (i) **SAC**, which uses a dual  $Q$  function and actor-critic  
 212 updates in (4) to (6), (ii) **EnsQ**, which uses an ensemble of  $Q$  functions and the same updates; and  
 213 (iii) **KLC**, which uses an ensemble of  $Q$  functions and a latent KL-regularized actor-critic update.

214 Apart from the actor-critic approach that iteratively improves the value functions and the policy,  
 215 recently Implicit  $Q$  Learning (IQL) (Kostrikov et al., 2021), a value-based offline RL algorithm,  
 216 has shown success in tackling various problems, including task-oriented dialogue management  
 217 (Snell et al., 2022). Within our MoE-LM framework, we propose the **IQL DM** algorithm, whose  
 218 value function  $V(z)$  minimizes the following loss:  $L_V = \mathbb{E}_{(z, z_a) \sim \Phi(\mathcal{D})} [L_2^\tau(Q_{\text{tar}}(z_a) - V(z))]$   
 219 where  $L_2^\tau$  is the expectile regression operator (Koenker and Hallock, 2001) of estimating the top-  
 220  $\tau$  expectile statistics, and the  $Q$  function of IQL is updated identically to that of actor-critic in  
 221 Eq. (4), which estimates  $Q(z_a) \approx r + \gamma V(z_+)$  via a least-square loss (Bradtke and Barto, 1996).  
 222 The  $V$  function estimates the top- $\tau$  quantile of the state-action  $Q(z_a)$  random variable at every  
 223 latent state  $z$ . When  $\tau \rightarrow 1$  IQL updates converge to the optimal  $Q$  function  $Q^*(z_a)$ , i.e.,  
 224  $\mathbb{E}_{(z_a, r, z_+) \sim \Phi(\mathcal{D})} [(r + \gamma \max_b Q^*(z_{+,b}) - Q^*(z_a))^2] \rightarrow 0$ , where  $z_{+,b} = \Phi(\mathbf{X}, a, X_+, b)$  for any  
 225 next-action utterance  $b$ . Intuitively, IQL leverages the generalization capacity of critic functions to  
 226 estimate the value of the best action without directly querying the values of unseen actions. This  
 227 makes it less conservative than most offline RL methods that either constrain the policy’s actions to  
 228 be in-distribution via behavior regularization (e.g., **SAC**, **EnsQ**, **KLC**).

229 **Auto-regressive Decoding in Actor Critic:** The actor-critic methods (SAC, EnsQ, KLC), to a certain  
 230 extent, ameliorated the two issues in offline RL (The inner maximization is replaced with  $V$  function  
 231 learning and covariate shift is controlled by policy entropy regularization.). However, implementing  
 232 these methods (Eq. (5) to (6)) entails sampling utterances from the current policy, i.e.,  $\hat{a} \sim \Psi \circ \mathcal{G}$ ,  
 233 which involves expensive auto-regressive LM decoding at every training update. To resolve this  
 234 issue, one may empirically replace  $\Psi \circ \mathcal{G}$  with a *teacher-forcing* variant (Toomarian and Bahren,  
 235 1995)  $\Psi_{\text{TF}}(a) \circ \mathcal{G}$ , which replaces auto-regressive decoding with a one-step generation from the bot  
 236 utterance  $a = Y$  in  $\mathcal{D}$ . This will further restrict the policy update of  $\mathcal{G}$  to be close to the behavior  
 237 policy. In contrast, since IQL does not perform explicit policy updates, it directly circumvents this  
 238 expensive auto-regressive sampling operation of  $\hat{a}$ .

239 **DM Construction in MoE-LMs:** Recall that in an MoE-LM, the DM policy  $\mu$  takes the encoded  
 240 conversation history  $z = \Phi(\mathbf{X})$ , the  $m + 1$  candidate action utterances generated by the experts  
 241  $\{\hat{Y}_i\}_{i=0}^m$ , and selects one of them to execute, i.e.,  $a \sim \mu(\cdot | z, \{\hat{Y}_i\}_{i=0}^m)$ . Given the  $Q$  function  
 242  $Q(z_a)$  learned via any of the above offline RL algorithms, we extract the DM policy  $\mu$  via softmax  
 243 greedification over the finite set of MoE candidate utterances i.e.,  $\mu(a | z, \{\hat{Y}_i\}_{i=0}^m) \propto \exp(\beta \cdot Q(z_a))$ ,  
 244 where  $\beta > 0$  is the policy temperature. This DM policy uses the  $Q$  function to score different  
 245 candidate utterances and returns an utterance based on the likelihood of these scores.

246 **5 Mixture-of-Expert Offline RL**

247 In Sec. 4, we presented how state-of-the-art offline RL methods are adapted to the MoE framework,  
 248 which can have limitations due to being agnostic to the model architecture. Recall that MoE dialogue  
 249 management is a specialized hierarchical reinforcement learning (HRL) problem, which optimizes  
 250 over a restricted class of DM policies defined by the convex hull of expert policy set (whose weights  
 251 are defined by the DM policy  $\mu$ ). This problem is of great interest because it reduces the original RL  
 252 DM problem, with a combinatorial action space, into one that has a much smaller finite action space.  
 253 Leveraging the *mixture-of-policy* structure, in the following we develop offline RL algorithms that  
 254 specifically target this HRL problem.

255 **Stochastic-action IQL (SAIQL):** Our first approach simply applies IQL to the discrete, stochastic  
 256 set of candidate action utterances  $\{\hat{Y}_i\}_{i=0}^m$  as generated by the MoE experts. Equipped with the latent  
 257 conversation data  $\Phi(D) = \{(z, z_a, r, z_+)\}$  (see Sec. 4) and the latent expert policies  $\{\mathcal{G}_i\}_{i=0}^m$  in the  
 258 MoE-LM, we propose the following DM algorithm, whose value function  $V(z)$  minimize the loss:

$$L_V = \frac{1}{m+1} \sum_{i=0}^m \mathbb{E}_{z, \hat{a}_i \sim \Psi \circ \mathcal{G}_i(\cdot|z)} [L_2^\tau(Q_{\text{tar}}(z_{\hat{a}_i}) - V(z))], \quad (7)$$

259 where  $z_{\hat{a}_i} = \Phi(\mathbf{X}, \hat{a}_i)$  is the latent state that corresponds to the action utterance sampled from the  
 260  $i$ -th expert,  $L_2^\tau$  is the expectile regression operator, and the  $Q$  function is updated based on Eq. (4).  
 261 To incorporate the maximization over candidate utterances from the experts into IQL, we compute  
 262 the expectile regression over the joint latent state and expert policy distributions.

263 However, unlike the standard IQL DM algorithm, which avoids autoregressive decoding for pol-  
 264 icy execution, SAIQL requires auto-regressive sampling of all  $m + 1$  candidate utterances. Sup-  
 265 pose the augmented latent conversation data  $\Phi(D)_{\text{SA}} = \{(z, z_a, r, z_+, \{z_{\hat{Y}_i}\}_{i=0}^m)\}$  (which also  
 266 includes the set of latent expert actions  $\{z_{\hat{Y}_i}\}_{i=0}^m$ ) is available. One straightforward way to cir-  
 267 cumvent this issue is by replacing the expectation over experts with the realized candidate utter-  
 268 ances, i.e., by approximating the value function in SAIQL with its unbiased empirical average  
 269  $\frac{1}{m+1} \sum_{i=0}^m \mathbb{E}_{(z, \{z_{\hat{Y}_i}\}_{i=0}^m) \sim \Phi(D)_{\text{SA}}} [L_2^\tau(Q_{\text{tar}}(z_{\hat{Y}_i}) - V(z))]$ .

270 While having access to candidate utterances is not standard in IQL, it is necessary here to allow  
 271  $Q$ -Learning to exploit quantile regression over *realized* candidate utterances (an approach shown to  
 272 be sound in Boutilier et al. (2018)). Therefore, we termed this method *stochastic action IQL (SAIQL)*  
 273 to reflect the stochastic action sets used in IQL training. Once **SAIQL** converges, the DM policy is  
 274 also constructed as a softmax of  $Q$  values applied to each candidate utterance.

275 The **MoE MDP** is defined as  $\bar{\mathcal{M}} = (\bar{\mathcal{S}}, \bar{\mathcal{A}}, \bar{P}, \bar{r}, \bar{s}_0, \gamma)$ , where the state space is the product of the  
 276 learned latent space  $\mathcal{Z}$  and the joint action space of the  $m + 1$  experts, i.e.,  $\bar{\mathcal{S}} = \mathcal{Z} \times \mathcal{A}^{m+1}$ , the  
 277 action space consists of the  $m + 1$  experts, i.e.,  $\bar{\mathcal{A}} = \{0, \dots, m\}$ , its initial state  $\bar{s}_0$  is the encoding  
 278 of the initial user’s query and the utterances suggested by the experts in response to this query, the  
 279 transition models both the user’s responses and also the next experts’ actions, and the reward is the  
 280 same as in the original MDP. Since MoE-MDP has a finite number of actions, learning a policy  $\lambda$  is  
 281 equivalent to solving a finite-action MDP:  $\lambda^* \in \arg \max_{\lambda} J_{\lambda} := \mathbb{E}[\sum_{k=0}^{\infty} \gamma^k \bar{r}_k | \bar{P}, \bar{s}_0, \lambda]$ .

282 **Follow-the-Leading-Expert (FtLE):** Banijamali et al. (2019) showed that the MoE-MDP problem  
 283 is NP-hard but can be approximated by  $\max_{\lambda \in \Delta^{m+1}} \sum_{i=0}^m \lambda(i) V^i(z) + \mathcal{U}(\bar{\mathcal{M}})$ , where  $V^i$  is the  
 284 value function of the  $i$ -th expert and  $\mathcal{U}(\bar{\mathcal{M}}) > 0$  is a surrogate function that depends on the experts’  
 285 stationary distributions. However, computing these distributions is generally intractable as the experts  
 286 are LMs themselves. This motivates our heuristic **FtLE** algorithm, which ignores the second term, to  
 287 train a set of expert critic functions, and picks the best action at each step. To efficiently parameterize  
 288 the critic function, similarly to the architecture used in DQN (Mnih et al., 2013) for discrete-action  
 289 RL, we define a  $(m + 1)$ -headed critic function, where each head represents the value of following  
 290 an expert’s policy. We then modify the standard critic loss functions as follows, in order to train the  
 291 multi-headed critic functions:

$$L_Q = \sum_{i=0}^m \mathbb{E}_{z, z_a, r, z_+} [(r + \gamma V_{\text{tar}}^i(z_+) - Q^i(z_a))^2], \quad L_V = \sum_{i=0}^m \mathbb{E}_{z, \hat{a}_i \sim \Psi \circ \mathcal{G}_i(\cdot|z)} [(Q_{\text{tar}}^i(z_{\hat{a}_i}) - V^i(z))^2], \quad (8)$$

292 where  $Q^i$  and  $V^i$  represent the critic-function head for expert  $i$ . To overcome the auto-regressive  
 293 sampling issue in Eq. (8), we relabel the offline conversation data  $\mathcal{D}$  by assigning action utterances

294 to train the critic function(s) whose corresponding expert(s) most likely generate those utterances.  
 295 Specifically, consider the following V-function loss

$$L_V = \sum_{i=0}^m \mathbb{E}_{z, z_a, Y} [\mathbf{1}_{i=i(z, Y)} \cdot (Q_{\text{tar}}^i(z_a) - V^i(z))^2], \quad (9)$$

296 where  $\mathbf{1}_{i=i(z, z_a)}$  selects the expert based on the best log-likelihood  $i(z, Y) := \arg \max_i \log \Psi(Y | z^{i'})$ ,  
 297 with  $z^{i'} \sim \mathcal{G}_i(\cdot | z)$ . After learning the critic functions, the **FtLE** DM policy can then constructed via  
 298  $\mu(a | z, \{\hat{Y}_i\}_{i=0}^m) \propto \exp(\beta Q^{i(z, a)}(z_a))$ .

299 **Value-based RL for MoE-MDP (MoE-VRL):** Consider a  $(m + 1)$ -headed value function  $\Lambda$  of the  
 300 MoE-MDP, where each head represents the optimal value by choosing the corresponding expert’s  
 301 action. Applying standard DQN, this function can be learned by minimizing the following loss:

$$L_\Lambda = \mathbb{E}_{z, Y, r, z_+} [(r + \gamma \max_{i_+} \Lambda_{\text{tar}}(z_+, i_+) - \Lambda(z, i(z, Y)))^2], \quad (10)$$

302 where  $\Lambda_{\text{tar}}$  is the target- $\Lambda$  network. For simpler exposition, we only use the partial MoE-MDP states  
 303 of encoded conversations in the above DQN loss and omit the candidate action utterances. Extending  
 304 to the full MoE-MDP state is straight-forward but is omitted for brevity. The inner maximization  
 305 over  $i_+$  can be computed explicitly because the MoE-MDP action space of expert indices is finite  
 306 and small. Here,  $i(z, Y)$  is the same index function that attributes utterance  $Y$  to the expert that most  
 307 likely generates it, based on likelihood. With the optimal value function  $\Lambda^*(z, i)$ , the MoE-MDP  
 308 policy picks the best expert  $\lambda^*(z) := \arg \max_i \Lambda^*(z, i)$ , and the DM policy can be constructed as  
 309  $\mu(a | z, \{\hat{Y}_i\}_{i=0}^m) \propto \exp(\beta Q^{\lambda^*(z)}(z_a))$ , where  $Q^{\lambda^*(z)}(z_a)$  is the critic of the optimal expert.

## 310 6 MoE-based DM Experiments

311 We evaluate our MoE-based offline RL algorithms on two open-domain benchmarks that are com-  
 312 mon in the RL-based dialogue management literature (Jaques et al., 2019). The first one is the  
 313 Cornell Movie corpus (Danescu-Niculescu-Mizil and Lee, 2011), which consists of conversations  
 314 between speakers in different movie. The second is the Reddit Casual (Ghandeharioun et al., 2019)  
 315 conversations dataset, which is a subset of the Reddit corpus that only contains casual conversations.

316 **Environment:** We perform the experiment by having DM agents interact with a DialogPT (Zhang  
 317 et al., 2019) simulated-user environment. The task is to maximize user satisfaction, which is measured  
 318 by the user’s overall sentiment. To construct an immediate reward, we set  $r(X_+) := \ell_{\text{sent}}(X_+)$ ,  
 319 where  $\ell_{\text{sent}}(X)$  is a RoBerTa-based sentiment classifier (Liao et al., 2021), which assigns a score from  
 320  $[-1, 1]$  that is inversely proportional to the (negative) positive sentiment prediction probabilities.

321 We pre-train the MoE-LM with either the Cornell or Reddit dataset and construct 10 experts (i.e.,  
 322  $m = 9$ , plus the primitive expert), each corresponding to an individual intent in open-ended dialogues,  
 323 including "empathy", "optimism", "cheerfulness", "contentment", "dejection", "rage", "sorrow",  
 324 "questioning", "exploration", etc. See Appendix B for details. The conversation lasts for a total of 5  
 325 turns (with  $\gamma = 0.8$ ), where each turn entails a query/response from the user followed by an agent’s  
 326 utterance. During the agent’s turn, each expert generates 5 candidate utterances thus resulting in a total  
 327 of 50 candidate utterances. To evaluate the methods, we measure the return of the trajectory generated  
 328 by different agents via  $\mathbb{E}_{\mathbf{X}_0 \sim \mathcal{D}} [\sum_{i=0}^4 \gamma^i r(X_{i+1}) | Y_i \sim \text{LM}(\cdot | \mathbf{X}_i), X_{i+1} \sim P_{\text{Dialog-GPT}}(\cdot | \mathbf{X}_i, Y_i)]$

329 **Evaluation:** We employ two evaluation approaches, namely (i) a model-free approach that only  
 330 utilizes the learned  $Q$  function to score candidate utterances, and where the DM policy selects  
 331 the action utterance based on a softmax likelihood; and (ii) a model-based approach that uses the  
 332 Value function ( $V$ ) along with a learned next-user utterance model  $P_{\text{user}}(X_+ | z_Y)$ , that optimizes the  
 333 following loss:  $L_{P_{\text{user}}} = \mathbb{E}_{(z_a, r) \sim \mathcal{D}, \hat{X}_+ \sim P_{\text{user}}(\cdot | z_a)} [(r - r(\hat{X}_+))^2]$ . We first approximate the  $Q$  function  
 334 via  $Q(z_a) \approx r(\hat{X}_+) + \gamma V(\hat{z}_+)$ , where  $\hat{X}_+$  denotes the next user utterance sampled from  $P_{\text{user}}(\cdot | z_a)$ ,  
 335 then use that function to score candidate utterances, and, finally have the DM policy select the action  
 336 utterance analogously. Human evaluation is also conducted on the DM performances of different  
 337 offline RL agents. More details and results can be found in Appendix E and ??.

338 **Experiment 1: SOTA Offline RL with MoE-LMs:** The goal of this experiment is to investigate  
 339 the effectiveness of SOTA offline RL algorithms. In these experiments we only make use of the  
 340 primitive language model  $\text{LM}_0 = (\Phi, \mathcal{G}_0, \Psi)$  to generate sample utterances. To simulate previous  
 341 works using single policy settings, we fine-tune the latent base distribution  $\mathcal{G}_0$  for policy optimization

Table 1: SOTA offline RL methods.

| Algo Name | Reddit Casual      |                    | Cornell      |                    |
|-----------|--------------------|--------------------|--------------|--------------------|
|           | Model Free         | Model Based        | Model Free   | Model Based        |
| IQL       | 0.53 ± 0.47        | <b>4.25 ± 0.12</b> | -1.32 ± 0.19 | <b>1.47 ± 0.15</b> |
| SAC       | <b>0.97 ± 0.52</b> | 4.13 ± 0.21        | -1.55 ± 0.19 | 0.36 ± 0.26        |
| EnsQ      | 0.10 ± 0.40        | 4.06 ± 0.25        | -1.51 ± 0.20 | 0.21 ± 0.21        |
| KLC       | 0.31 ± 0.46        | 3.69 ± 0.37        | -1.46 ± 0.21 | -0.07 ± 0.25       |
| BC        |                    | -0.65 ± 0.41       |              | -2.18 ± 0.36       |
| Bandits   |                    | <b>4.3 ± 0.16</b>  |              | 1.3 ± 0.17         |

Table 2: MoE specific offline RL methods.

| Algo Name | Reddit Casual      |                    | Cornell             |                    |
|-----------|--------------------|--------------------|---------------------|--------------------|
|           | Model Free         | Model Based        | Model Free          | Model Based        |
| EXP 1*    | 0.97 ± 0.52        | 4.25 ± 0.12        | -1.32 ± 0.19        | 1.47 ± 0.15        |
| SAIQL     | 0.81 ± 0.42        | <b>4.65 ± 0.06</b> | -1.34 ± 0.25        | 2.61 ± 0.24        |
| FtLE      | <b>1.14 ± 0.49</b> | 4.59 ± 0.07        | <b>-0.39 ± 0.24</b> | 3.51 ± 0.19        |
| MoE-VRL   | 0.72 ± 0.47        | 4.46 ± 0.10        | -0.58 ± 0.24        | <b>3.62 ± 0.17</b> |

342 while keeping the encoder-decoder ( $\Phi, \Psi$ ) fixed. As mentioned in Sec. 4 we deploy the following  
343 offline RL algorithms to train the DM policy  $\mu$  of MoE-LMs: (i) **SAC** (Haarnoja et al., 2018) with a  
344 dual  $Q$  function critic (Fujimoto et al., 2018); (ii) **EnsQ**, which utilizes an ensemble of  $Q$  functions  
345 (Jaques et al., 2019) with actor-critic; (iii) **KLC** (Saleh et al., 2020), which utilizes the dual  $Q$   
346 function and applies KL regularization between the latent policy  $\mathcal{G}$  and the primitive policy  $\mathcal{G}_0$ ,  
347 i.e.,  $\mathbb{E}_{\mathcal{G}(\cdot|z)}[\log(\mathcal{G}(z'|z)/\mathcal{G}_0(z'|z))]$  in the actor-critic algorithm update <sup>2</sup>; (iv) **IQL** (Kostrikov et al.,  
348 2021), which adopts the idea from Q learning to estimate an optimal  $Q$  function in the MoE-LM  
349 latent space. To our knowledge, our work is among the first that uses IQL for open-domain dialogue  
350 management. These methods have been implemented in ways where the original idea has been  
351 preserved, making the comparison fair to the original works. With each learned  $Q$  function, the  
352 bot picks the final action by sampling from a softmax distribution of  $Q$  scores over all candidate  
353 utterances. To demonstrate the efficacy of offline RL methods, we also include results from Behavior  
354 Cloning (**BC**) as well as simple reward maximization (**Bandit**)(i.e,  $\gamma = 0$ ) for comparisons.

355 Table 1 presents the results of our experiments with these methods in the open-dialogue system,  
356 where a 5-turn conversation was generated. The table displays the mean return over 100 conversations  
357 with their respective standard errors. Our experiments demonstrate that model-based evaluation can  
358 significantly improve dialogue management over the model-free counterpart, even with a next-user  
359 LM that is much simpler than the Dialog-GPT user. Among most model-based and model-free  
360 evaluations, we found that **IQL**, originally designed to tackle offline RL problems, outperforms other  
361 RL methods. This performance can be attributed to IQL’s ability to (i) alleviate  $Q$  overestimation  
362 errors due to co-variate shifts; (ii) estimate the optimal values without being overly conservative w.r.t.  
363 the behavior policy, and (iii) avert the auto-regressive utterance sampling issues in training.

364 Interestingly, we also found that **KLC** and **EnsQ**, two standard methods in RL-based DM, struggled  
365 to achieve satisfactory performance in our experiments. This may be due to the fact that applying  
366 dropout (for ensemble  $Q$ ) and KL regularization in the fixed MoE-LM latent space makes DM  
367 algorithms overly conservative. In contrast, **SAC** successfully learns a well-performing model-free  
368 DM policy but fails in the model-based regime, potentially demonstrating its instability in critic-  
369 function learning. **BC** also fails to provide any satisfactory performance on any of the domains and  
370 surprisingly, **Bandit** method or plain reward maximization did as well as **IQL**, pointing to the fact  
371 that maybe the offline RL methods being used or not exactly helping in planning at all.

372 **Experiment 2: MoE-specific Offline RL:** In this experiment, we explore the benefits of leveraging  
373 the MoE framework for training offline RL agents in open-domain conversational systems. Building  
374 upon the insights from our previous experiment (Experiment 1), we propose several modifications to  
375 standard Offline RL algorithms to take advantage of the MoE framework. As mentioned in Sec. 5,  
376 we developed the following MoE-specific offline RL algorithms for DM: (i) **SAIQL**, which extends  
377 IQL to incorporate the multiple candidate utterances generated by the experts; (ii) **FtLE**, which  
378 learns a DM policy to follow the best expert policy at each step ( estimation of the experts’ long-term  
379 values is done concurrently with a multi-headed critic architecture and data relabeling) and (iii)  
380 **MoE-VRL**, which learns an optimal meta-value function over the space of experts. Leveraging the  
381 MoE-MDP formulation, solving which leads to an optimal DM policy that provides the optimal  
382 sequences of expert policy switching. We aim to evaluate the potential of these MoE-specialized  
383 offline RL algorithms over off-the-shelf offline RL methods in DM.

384 Table 2 shows the return observed similar to ones displayed in table 1. The first row in the table  
385 displays the best performance across all methods from Experiment 1, for comparison. Our results  
386 demonstrate the efficacy of the proposed methods that utilize the structure of the MoE framework

<sup>2</sup>The RL DM approach in Jaques et al. (2019) which applies KL regularization at the word-level LM policy is not applicable to our case because our DM policy is defined in the latent space.



387 in dialogue management. All the methods that used all experts while training (**SAIQL**, **FtLE**, and  
 388 **MoE-VRL**) outperformed the SOTA offline RL methods, indicating that an offline RL algorithm  
 389 that takes the candidate utterances into account can generally improve dialogue planning. Moreover,  
 390 making the RL algorithms attuned to the multiple-expert structure (i.e., **FtLE** and **MoE-VRL**) indeed  
 391 results in even better DM performance, emphasizing the benefits of reformulating the DM MDP using  
 392 the HRL paradigm, where the DM policy is optimized over a restricted class of finite-action policies.  
 393 Also, we note that only MoE-aware offline RL methods were actually able to outperform simple  
 394 per-step greedification (i.e. **Bandit**) which hints to the fact that they were actually able to plan ahead  
 395 and perform long-term credit assignments to optimize return. Whereas all the standard offline RL  
 396 methods failed to do that (Table 1). Using multiple critic functions to separately estimate the value  
 397 of different experts also allows us to better understand their long-term utility (of the corresponding  
 398 intents) and how they affect the conversation quality. Overall, these findings highlight the potential of  
 399 the MoE-specific offline RL methods to improve dialogue management performance.

400 **Experiment 3** aims to investigate the effectiveness of selecting different experts during dialogue  
 401 management. To this end, we conduct a study where we measure the frequency with which different  
 402 experts are selected throughout the conversation. Specifically, we demonstrate the diversity of  
 403 intents in different offline RL algorithms in the model-based evaluation of the Cornell dataset.

404 Given approximately 200 conversation turns, we mea-  
 405 sure the frequency of the expert agents when their  
 406 utterances are selected and preset such frequency  
 407 metric for the worst performing Offline RL method  
 408 (**EnsQ**), a good performing method (**IQL**), and an  
 409 MoE-specific RL algorithm (such as **MoE-VRL**). To  
 410 visualize our findings, we plot a histogram of the fre-  
 411 quencies on different experts being selected and cal-  
 412 culate the KL divergence distance of this histogram  
 413 and a uniform distribution over the experts. While  
 414 we acknowledge that a uniform distribution may not  
 415 be the optimal distribution of utterances, it provides  
 416 a measure of how well the agents make use of different  
 417 experts, along with their actual performance.

418 The results of Experiment 3 are shown in Figure 2,  
 419 where we plot the frequency histogram of different  
 420 expert agent utterances. We observe that the worst performing agent, **EnsQ**, has a highly skewed  
 421 distribution of expert selections, with a few experts being heavily favored over others. This suggests  
 422 that **EnsQ** is less diverse and does not effectively utilize the full range of expert knowledge available.  
 423 On the other hand, both **IQL** and **MoE-VRL** exhibit a more balanced distribution of expert selection,  
 424 with utterances chosen from multiple experts throughout the conversation; i.e., their frequency  
 425 distributions are closer to a uniform distribution, with much lower KL divergence distance.

426 However, there is a clear performance gap between the two methods, with **MoE-VRL** significantly  
 427 outperforming **IQL**. This highlights the importance of incorporating the MoE framework to better  
 428 utilize the knowledge of different experts in dialogue planning, rather than relying on generating a  
 429 diverse set of candidate utterances. Overall, these results suggest that encouraging diversity in intents  
 430 and better utilizing expert knowledge in planning are essential to improve DM performance.

## 431 7 Concluding Remarks

432 By leveraging the recent advances of Mixture-of-Expert Language Models (MoE-LMs), we developed  
 433 a suite of offline RL-based DM algorithms. Our methods significantly reduce the action space and  
 434 improve the efficacy of DM. To understand how well our offline RL approaches generate diverse  
 435 utterances and solve DM problems, we evaluated them on two open-domain dialogue tasks and  
 436 compared them with SOTA offline RL baselines. Our results showed that by exploiting the MoE-LM  
 437 structure, our specialized offline RL DM methods (i) improve the diversity of intents in bot utterances;  
 438 (ii) have better sample efficiency; and (iii) yield better overall performance in both the model-based  
 439 and model-free settings. Our work provides important insights on how to create scalable RL-based  
 440 DM methods that train chatbots to achieve dialogue tasks and enhance user satisfaction. Future work  
 441 includes fine-tuning the experts (i.e., low-level policies) with offline RL, learning the optimal semantic  
 442 representation for hierarchical RL, preventing dialogue agents from generating harmful behaviors  
 443 (e.g., by enforcing safety constraints in the RL algorithms), and evaluating our DM methods on more  
 444 realistic problems, such as customer support, conversational recommendation, and persuasion.

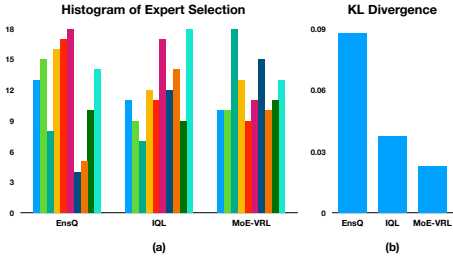

Figure 2: Experiment on the Cornell dataset with Model-based evaluation(a) Histogram of frequency of expert selection. (b) KL divergence against a uniform distribution

## 445 References

- 446 Asadi, K. and Williams, J. (2016). Sample-efficient deep reinforcement learning for dialog control.  
447 *arXiv preprint arXiv:1612.06000*.
- 448 Bahl, L., Jelinek, F., and Mercer, R. (1983). A maximum likelihood approach to continuous speech  
449 recognition. *IEEE transactions on pattern analysis and machine intelligence*, (2):179–190.
- 450 Banijamali, E., Abbasi-Yadkori, Y., Ghavamzadeh, M., and Vlassis, N. (2019). Optimizing over a  
451 restricted policy class in mdps. In *The 22nd International Conference on Artificial Intelligence*  
452 *and Statistics*, pages 3042–3050. PMLR.
- 453 Boutilier, C., Cohen, A., Hassidim, A., Mansour, Y., Meshi, O., Mladenov, M., and Schuurmans, D.  
454 (2018). Planning and learning with stochastic action sets. In *Proc. of the 27th International Joint*  
455 *Conf. on Artificial Intelligence*, pages 4674–4682.
- 456 Bradtke, S. J. and Barto, A. G. (1996). Linear least-squares algorithms for temporal difference  
457 learning. *Machine learning*, 22(1-3):33–57.
- 458 Carta, S., Ferreira, A., Podda, A. S., Recupero, D. R., and Sanna, A. (2021). Multi-dqn: An  
459 ensemble of deep q-learning agents for stock market forecasting. *Expert systems with applications*,  
460 164:113820.
- 461 Chien, J. and Kuo, C. (2019). Markov recurrent neural network language model. In *2019 IEEE*  
462 *Automatic Speech Recognition and Understanding Workshop (ASRU)*, pages 807–813. IEEE.
- 463 Chow, Y., Tulepbergenov, A., Nachum, O., Ryu, M., Ghavamzadeh, M., and Boutilier, C. (2022). A  
464 mixture-of-expert approach to rl-based dialogue management. *CoRR*, abs/2206.00059.
- 465 Chu, W., Li, L., Reyzin, L., and Schapire, R. (2011). Contextual bandits with linear payoff functions.  
466 In *Proceedings of the Fourteenth International Conference on Artificial Intelligence and Statistics*,  
467 pages 208–214. JMLR Workshop and Conference Proceedings.
- 468 Danescu-Niculescu-Mizil, C. and Lee, L. (2011). Chameleons in imagined conversations: A new ap-  
469 proach to understanding coordination of linguistic style in dialogs. *arXiv preprint arXiv:1106.3077*.
- 470 Fujimoto, S., van Hoof, H., and Meger, D. (2018). Addressing function approximation error in  
471 actor-critic methods. In *Proceedings of the 35th International Conference on Machine Learning,*  
472 *ICML 2018, Stockholmsmässan, Stockholm, Sweden, July 10-15, 2018*.
- 473 Ghandeharioun, A., Shen, J., Jaques, N., Ferguson, C., Jones, N., Lapedriza, A., and Picard, R.  
474 (2019). Approximating interactive human evaluation with self-play for open-domain dialog  
475 systems. *Advances in Neural Information Processing Systems*, 32.
- 476 Greensmith, E., Bartlett, P., and Baxter, J. (2004). Variance reduction techniques for gradient  
477 estimates in reinforcement learning. *Journal of Machine Learning Research*, 5(9).
- 478 Haarnoja, T., Zhou, A., Abbeel, P., and Levine, S. (2018). Soft actor-critic: Off-policy maximum  
479 entropy deep reinforcement learning with a stochastic actor. *ICML*.
- 480 Hurley, N. and Rickard, S. (2009). Comparing measures of sparsity. *IEEE Transactions on Informa-*  
481 *tion Theory*, 55(10):4723–4741.
- 482 Jaques, N., Ghandeharioun, A., Shen, J., Ferguson, C., Lapedriza, A., Jones, N., Gu, S., and Picard,  
483 R. (2019). Way off-policy batch deep reinforcement learning of implicit human preferences in  
484 dialog. *arXiv:1907.00456*.
- 485 Koenker, R. and Hallock, K. F. (2001). Quantile regression. *Journal of economic perspectives*,  
486 15(4):143–156.
- 487 Kostrikov, I., Nair, A., and Levine, S. (2021). Offline reinforcement learning with implicit q-learning.  
488 *arXiv preprint arXiv:2110.06169*.
- 489 Levin, E. and Pieraccini, R. (1997). A stochastic model of computer-human interaction for learning  
490 dialogue strategies. In *Eurospeech*, volume 97, pages 1883–1886. Citeseer.

- 491 Levine, S., Kumar, A., Tucker, G., and Fu, J. (2020). Offline reinforcement learning: Tutorial, review,  
492 and perspectives on open problems. *arXiv preprint arXiv:2005.01643*.
- 493 Li, J., Galley, M., Brockett, C., Gao, J., and Dolan, B. (2015). A diversity-promoting objective  
494 function for neural conversation models. *arXiv preprint arXiv:1510.03055*.
- 495 Li, J., Monroe, W., Ritter, A., Galley, M., Gao, J., and Jurafsky, D. (2016). Deep reinforcement  
496 learning for dialogue generation. *arXiv preprint arXiv:1606.01541*.
- 497 Li, J., Monroe, W., Shi, T., Jean, S., Ritter, A., and Jurafsky, D. (2017). Adversarial learning for  
498 neural dialogue generation. *arXiv preprint arXiv:1701.06547*.
- 499 Liao, W., Zeng, B., Yin, X., and Wei, P. (2021). An improved aspect-category sentiment analysis  
500 model for text sentiment analysis based on roberta. *Applied Intelligence*, 51(6):3522–3533.
- 501 Mnih, V., Kavukcuoglu, K., Silver, D., Graves, A., Antonoglou, I., Wierstra, D., and Riedmiller, M.  
502 (2013). Playing atari with deep reinforcement learning. *arXiv preprint arXiv:1312.5602*.
- 503 Saleh, A., Jaques, N., Ghandeharioun, A., Shen, J., and Picard, R. (2020). Hierarchical reinforcement  
504 learning for open-domain dialog. In *Proceedings of the AAAI Conference on Artificial Intelligence*,  
505 volume 34, pages 8741–8748.
- 506 Serban, I., Sankar, C., Germain, M., Zhang, S., Lin, Z., Subramanian, S., Kim, T., Pieper, M., Chandar,  
507 S., Ke, N., et al. (2017). A deep reinforcement learning chatbot. *arXiv preprint arXiv:1709.02349*.
- 508 Shah, P., Hakkani-Tur, D., Liu, B., and Tür, G. (2018). Bootstrapping a neural conversational agent  
509 with dialogue self-play, crowdsourcing and on-line reinforcement learning. In *Proceedings of the*  
510 *2018 Conference of the North American Chapter of the Association for Computational Linguistics:*  
511 *Human Language Technologies, Volume 3 (Industry Papers)*, pages 41–51.
- 512 Shi, W. and Yu, Z. (2018). Sentiment adaptive end-to-end dialog systems. *arXiv preprint*  
513 *arXiv:1804.10731*.
- 514 Shin, J., Xu, P., Madotto, A., and Fung, P. (2020). Generating empathetic responses by looking ahead  
515 the user’s sentiment. In *ICASSP 2020-2020 IEEE International Conference on Acoustics, Speech*  
516 *and Signal Processing (ICASSP)*, pages 7989–7993. IEEE.
- 517 Singh, S., Litman, D., Kearns, M., and Walker, M. (2002). Optimizing dialogue management with  
518 reinforcement learning: Experiments with the njfun system. *Journal of Artificial Intelligence*  
519 *Research*, 16:105–133.
- 520 Snell, C., Kostrikov, I., Su, Y., Yang, M., and Levine, S. (2022). Offline rl for natural language  
521 generation with implicit language q learning. *arXiv preprint arXiv:2206.11871*.
- 522 Sutskever, I., Vinyals, O., and Le, Q. (2014). Sequence to sequence learning with neural networks.  
523 *Advances in neural information processing systems*, 27.
- 524 Sutton, R., McAllester, D., Singh, S., and Mansour, Y. (1999a). Policy gradient methods for  
525 reinforcement learning with function approximation. *Advances in neural information processing*  
526 *systems*, 12.
- 527 Sutton, R. S., Precup, D., and Singh, S. (1999b). Between mdps and semi-mdps: A framework for  
528 temporal abstraction in reinforcement learning. *Artif. Intell.*
- 529 Toomarian, N. and Bahren, J. (1995). Fast temporal neural learning using teacher forcing.
- 530 Vaswani, A., Shazeer, N., Parmar, N., Uszkoreit, J., Jones, L., Gomez, A., Kaiser, L., and Polosukhin,  
531 I. (2017). Attention is all you need. *Advances in neural information processing systems*, 30.
- 532 Verma, S., Fu, J., Yang, M., and Levine, S. (2022). Chai: A chatbot ai for task-oriented dialogue with  
533 offline reinforcement learning. *arXiv preprint arXiv:2204.08426*.
- 534 Walker, M. (2000). An application of reinforcement learning to dialogue strategy selection in a  
535 spoken dialogue system for email. *Journal of Artificial Intelligence Research*, 12:387–416.
- 536 Watkins, C. J. C. H. and Dayan, P. (1992). Technical note q-learning. *Mach. Learn.*

- 537 Williams, J. and Young, S. (2007). Partially observable markov decision processes for spoken dialog  
538 systems. *Computer Speech & Language*, 21(2):393–422.
- 539 Wolf, T., Debut, L., Sanh, V., Chaumond, J., Delangue, C., Moi, A., Cistac, P., Rault, T., Louf, R.,  
540 Funtowicz, M., and Brew, J. (2019). Huggingface’s transformers: State-of-the-art natural language  
541 processing. *CoRR*, abs/1910.03771.
- 542 Young, S., Gašić, M., Keizer, S., Mairesse, F., Schatzmann, J., Thomson, B., and Yu, K. (2010).  
543 The hidden information state model: A practical framework for pomdp-based spoken dialogue  
544 management. *Computer Speech & Language*, 24(2):150–174.
- 545 Zhang, Y., Sun, S., Galley, M., Chen, Y., Brockett, C., Gao, X., Gao, J., Liu, J., and Dolan, B.  
546 (2019). Dialogpt: Large-scale generative pre-training for conversational response generation. *arXiv*  
547 *preprint arXiv:1911.00536*.
- 548 Zhao, T., Xie, K., and Eskenazi, M. (2019). Rethinking action spaces for reinforcement learning in  
549 end-to-end dialog agents with latent variable models. *arXiv preprint arXiv:1902.08858*.

550 **A Additional Results**

551 **A.1 Diversity over all agents and Datasets**

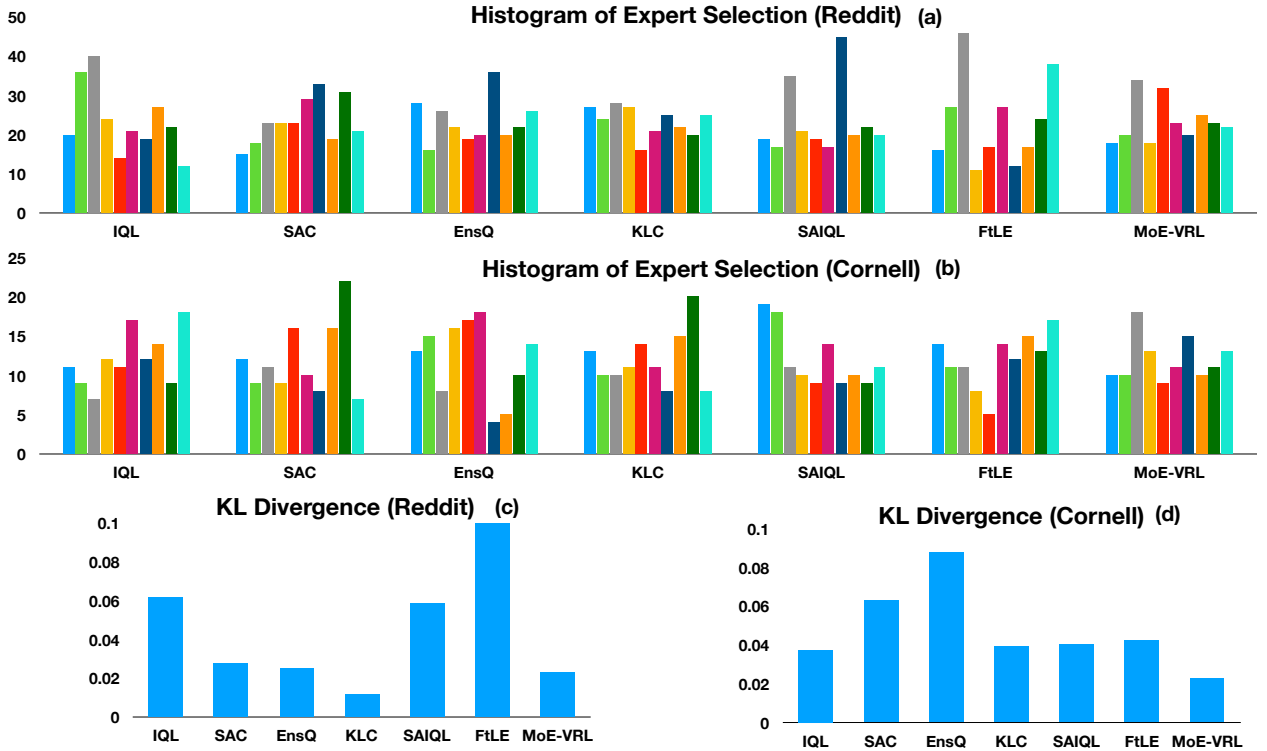

Figure 3: Diversity for all agents (a) Reddit with Model-based approximation, (b) Cornell with Model-based approximation, (c) and (d) depict the KL divergence of all agents w.r.t. to uniform distribution for Reddit and Cornell.

552 **A.2 Different Metrics for MoE-LM's**

553 To measure the quality of LMs learned in MoE-LM we measure the following three metrics, similar  
 554 to Chow et al. (2022) for 25 generated utterances. **Diversity** : measured as  $1 - \text{Sparsity}$  Hurley and  
 555 Rickard (2009) of the singular values of the embedded utterances, **Gram- $\{1,2,3\}$**  Li et al. (2015) :  
 556 Ratio of unique  $\{\text{uni, bi, tri}\}$ -gram in generated utterances, and finally **Perplexity** Bahl et al. (1983).

| Dataset | Diversity       | Gram-1 | Gram-2 | Gram-3 | Perplexity        |
|---------|-----------------|--------|--------|--------|-------------------|
| Reddit  | $0.14 \pm 0.05$ | 0.35   | 0.77   | 0.90   | $38.81 \pm 17.34$ |
| Cornell | $0.12 \pm 0.04$ | 0.31   | 0.60   | 0.79   | $43.87 \pm 28.81$ |

Table 3: Diversity, Gram- $\{1,2,3\}$ , and Perplexity of the MoE-LM primitive expert on Reddit Casual and Cornell

| Dataset | Question        | Exploration     | Positive Sent.  | Negative Sent.  | Sent. Coherence | Joy             | Optimism        | Anger           | Sadness         |
|---------|-----------------|-----------------|-----------------|-----------------|-----------------|-----------------|-----------------|-----------------|-----------------|
| Reddit  | $0.95 \pm 0.27$ | $0.47 \pm 0.21$ | $3.29 \pm 0.33$ | $1.42 \pm 0.38$ | $0.51 \pm 0.40$ | $1.99 \pm 0.38$ | $1.25 \pm 0.43$ | $1.48 \pm 0.39$ | $2.01 \pm 0.46$ |
| Cornell | $1.58 \pm 0.39$ | $0.33 \pm 0.17$ | $3.55 \pm 0.99$ | $1.90 \pm 0.5$  | $0.69 \pm 0.40$ | $2.44 \pm 0.71$ | $2.11 \pm 0.99$ | $2.71 \pm 0.69$ | $3.45 \pm 0.83$ |

Table 4: Quality of Each Expert Trained on Reddit Casual and Cornell with respect to their trained label.

## 557 B Experimental Details

558 This section describes more details about our experimental setup to evaluate the algorithms.

### 559 B.1 Model parameters and Description

560 **Language Model Description** We make use of the **MoE-2** model as described in Chow et al. (2022)  
561 which is based on transformer Vaswani et al. (2017). This variant of MoE had shown diversity in its  
562 utterances while retaining semantic fluency with low perplexity. The model was not too large that it  
563 would become too costly to use it while training. We are repeating the details of the model over here  
564 for ease of the user, but the details remain the same from Chow et al. (2022).

565 Our MoE uses the simple transformer architecture, where the model parameters are summarized in  
566 Table 5:

| Parameter             | Value |
|-----------------------|-------|
| Number of layers      | 2     |
| Embedding hidden size | 256   |
| FFN inner hidden size | 512   |
| Attention heads       | 8     |
| Key size              | 256   |
| Value size            | 256   |
| Dropout               | 0.1   |

Table 5: Simple Transformer Architecture

567 Latent distributions  $\{\mathcal{G}_i\}$  are implemented as FFN that model mean and variance of the normal  
568 distribution. We use a target entropy of 1.0. The parameters for FFN are captured in Table 6 (note:  
569 FFN has a final layer without an activation).

| $\{\mathcal{G}_i\}$ FFN parameter | Value |
|-----------------------------------|-------|
| Number of layers                  | 1     |
| Activation                        | tanh  |
| FFN Hidden Size                   | 128   |

Table 6:  $\{\mathcal{G}_i\}$  FFN architecture

### 570 B.2 Computational resources

571 Training and evaluation were run on 8 GPU instances with 32GB of RAM and a NVIDIA Tesla P100  
572 graphics card. Training each experts takes around 2-3 days, and training each RL can take around 12  
573 hours.

### 574 B.3 Dataset

575 Our models were developed using two conversational datasets, namely Reddit Casual and Cornell  
576 Movie. We obtained these datasets from the Neural Chat datasets of the MIT Media Lab, which  
577 is available at the following link: [https://affect.media.mit.edu/neural\\_chat/datasets](https://affect.media.mit.edu/neural_chat/datasets).  
578 These datasets comprise conversations between two speakers and each batch of training data consists  
579 of a subset of these conversations. The Reddit Casual dataset is approximately three times larger than  
580 the Cornell corpus.

### 581 B.4 Offline RL Training & Details

582 Table 7 summarizes the hyper-parameters that were used for training the  $Q, V$  functions.

583 We depict the minor implementations differences between the baseline RL methods that were  
584 implemented for comparison in Table 8. These tricks are often overlooked and we provide them here  
585 for the sake of completeness.

| Hyper Parameter             | Value              |
|-----------------------------|--------------------|
| Number of layers ( $Q, V$ ) | 3                  |
| Activation                  | ReLU               |
| Hidden Size                 | 512                |
| Epochs                      | 100                |
| Max Unroll                  | 30                 |
| Batch Size                  | 256                |
| Learning Rate               | $2 \times 10^{-3}$ |
| Optimizer                   | Adam               |
| $\tau$ (IQL)                | 0.9                |
| Dropout (EnsQ, KLC)         | 0.5                |

Table 7: Hyper parameters for training the RL agents.

| Method | Multiple Q | Dropout Q | Target V | Target Q | Learn Policy | Entropy Regularization | Behavior Policy Regularization |
|--------|------------|-----------|----------|----------|--------------|------------------------|--------------------------------|
| IQL    | No         | Yes       | Yes      | Yes      | Yes          | Yes                    | No                             |
| SAC    | No         | Yes       | Yes      | Yes      | Yes          | Yes                    | Yes                            |
| EnsQ   | Yes        | No        | Yes      | Yes      | Yes          | Yes                    | No                             |
| KLC    | Yes        | No        | No       | Yes      | No           | No                     | No                             |

Table 8: Implementation details of different Offline RL methods

## 586 B.5 Expert Label Functions

587 We have used a gamut of expert language models which constitute experts having a wide array of  
588 emotions and characteristics. The first set of six experts are *sentiment-based*, where to quantify the  
589 sentiment, we have used a state-of-art sentiment classifier, i.e. RoBERTa Liao et al. (2021). The  
590 sentiment detector outputs 2 types of prediction. The first set corresponds to positive, negative and  
591 neutral and the second prediction corresponds to 4 emotions i.e. {joy, optimism, sadness, anger}.

592 We define the 6 sentiment labeling functions as  $l_{\text{pos-sent}}(Y)$ ,  $l_{\text{neg-sent}}(Y)$ ,  $l_{\text{joy}}(Y)$ ,  $l_{\text{optimism}}(Y)$ ,  
593  $l_{\text{anger}}(Y)$ ,  $l_{\text{sadness}}(Y)$ , which outputs a score that depends on sentiment prediction probability of  
594 any candidate bot utterance.

595 The remaining 4 experts deal more with conversational traits including sentence coherence  
596  $l_{\text{sent-coh}}(\mathbf{X}, Y)$ , question expert  $l_{\text{question}}(Y)$ , to improve user engagement by asking questions. Finally  
597 to encourage the agent to be able to change topic, we provide a final reward signal which allows the  
598 agent to give exploratory utterances through  $l_{\text{exp}}(\mathbf{X}, Y)$

## 599 B.6 Model Scale Description

600 The number of parameters used by each expert LM is set to be the same, namely  $\theta = 42M$  for the  
601 MoE. The number of parameters used in the Q and V function are also the same, namely  $\phi = 16M$ ,  
602 and  $\phi' = 12M$ .

| Algo Name | Number of Params         |
|-----------|--------------------------|
| IQL       | $2\phi + (m + 2)\theta$  |
| SAC       | $2\phi + (m + 2)\theta$  |
| EnsQ      | $2\phi + (m + 2)\theta$  |
| KLC       | $2\phi + (m + 2)\theta$  |
| SAIQL     | $2\phi' + (m + 2)\theta$ |
| FtLE      | $2\phi' + (m + 2)\theta$ |
| MoEVRL    | $3\phi' + (m + 2)\theta$ |

Table 9: Number of parameters for different algorithms,  $m$  is the number of experts

603 **C Use Case Figure**

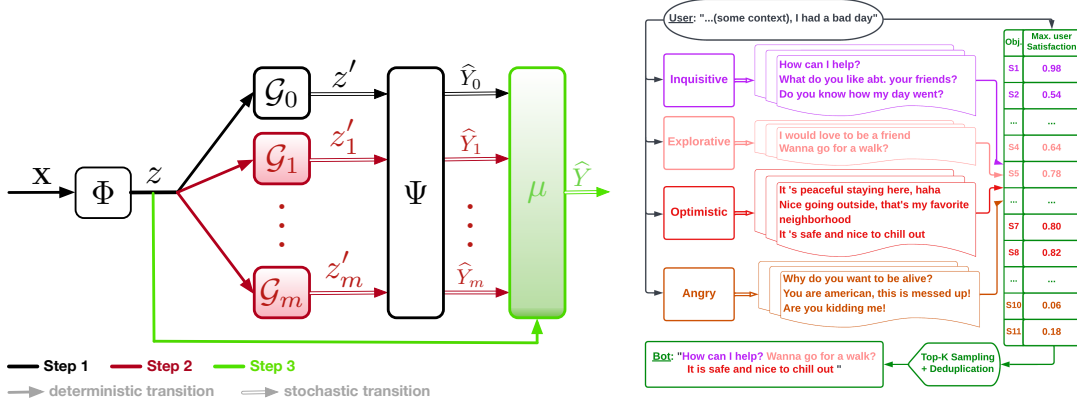

Figure 4: (Left) MoE-LM Architecture. (Right) Sample utterance workflow generated by an MoE-LM trained with Reddit data. Step 1:  $\Phi$  encodes conversation history. Step 2:  $\Psi \circ G_i, \forall i$ , generate candidate bot utterances. Step 3:  $\mu$  selects the bot response by  $Q$ -score ranking & post-processing.

604 **D Flow Chart**

605 Figure 5 describes the flow of training of the MoE framework along with RL components, starting  
 606 from Phase 1 up to Phase 3.

607 **E Human Evaluation Experiments**

608 We recruited 80 workers to provide a total of 600 ratings of the bots' quality, in terms of fluency,  
 609 and conversation-level sentiment improvement on the Reddit Casual ChitChat dataset. Evaluating  
 610 these language models with humans particularly tests these models' capabilities on generalization,  
 611 since humans have the final say in judging whether a model response is natural or not. Annotators are  
 612 asked to evaluate the fluency and sentiment improvement (over the conversation) of each individual  
 613 sample on a scale of 0 to 1. For example, in the fluency rating 0 corresponds to "not fluent at all" and  
 614 1 corresponds to "very fluent". We obtain 600 annotations to evaluate different agent LMs trained for  
 615 the Sentiment-improvement.

616 To evaluate the quality of sentiment improvement (for chit chat) in our language models, we conducted  
 617 human evaluations on two metrics: (i) task success / sentiment improvement and (ii) fluency. In  
 618 particular, let  $N$  be the number of conversations used for evaluating an arbitrary language model,  
 619  $S_{\text{task}}(N)$  be the number of conversations that the task is achieved. For Reddit Chat, the task metric  
 620 measures user's overall sentiment improvement and the score is between  $[0, 1]$ . Out of the total of  $N$   
 621 conversations, the final task metric is given by  $S_{\text{task}}(N)/N$ . For fluency, let  $G(N)$  be the number  
 622 of incomprehensible conversations out of the total of  $N$  conversations, then the fluency metric is  
 623 given by  $(1 - G(N))/N$ . To test for generalization, for each task and each language model under  
 624 evaluation we randomly generated  $N = 100$  user-agent conversations that has not been seen in  
 625 training, saved each on a Google form (whose format can be found in Figure 6 and employed raters  
 626 to obtain  $S_{\text{task}}(N)$  and  $G(N)$  for all the language model and skill pairs. Results are summarized in  
 627 Table 10.



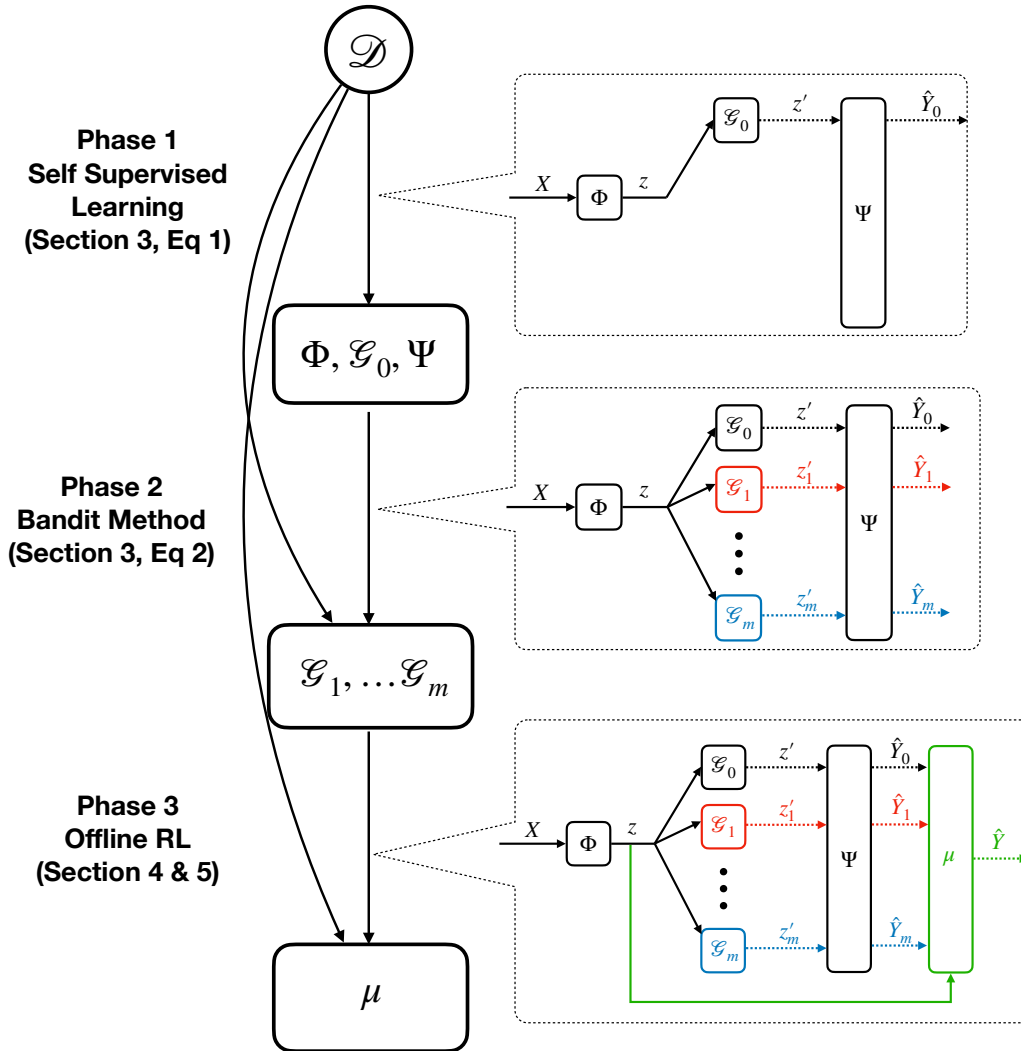

Figure 5: Flow Chart between different phases of the training procedure.

| Method  | Avg. Fluency    | Sentiment       |
|---------|-----------------|-----------------|
| BC      | $0.67 \pm 0.26$ | $0.24 \pm 0.50$ |
| KLC     | $0.62 \pm 0.27$ | $0.66 \pm 0.47$ |
| IQL     | $0.84 \pm 0.24$ | $0.72 \pm 0.46$ |
| SAIQL   | $0.81 \pm 0.19$ | $0.57 \pm 0.50$ |
| FtLE    | $0.88 \pm 0.24$ | $0.76 \pm 0.48$ |
| MoE-VRL | $0.72 \pm 0.28$ | $0.70 \pm 0.45$ |

Table 10: RL (Phase 3) Raters Evaluation

## 628 F Limitations and Broader Impact

629 In this paper, we delve into the application of offline reinforcement learning (RL) algorithms specifically  
 630 tailored for Mixture-of-Expert (MoE) dialogue management frameworks. However, due to  
 631 the primary emphasis on exploring the concept of employing offline RL, our experiments were  
 632 constrained to smaller language models with a capacity of approximately 20-30 million parameters. It  
 633 is worth noting that larger language models have demonstrated a tendency to generate more coherent

You are given this conversation between customer and agent:

user: 11:15 here, it's been a day for sure.  
agent: I am so tired.  
user: For you it has been a day but in your case I am not so sure.  
agent: what today did you do good thing today?  
user: Cleaned my 7-year-old son's room.  
agent: Been there it was good.

Not shared

\* Indicates required question

How many sentences look gibberish? \*

Examples of gibberish:  
- "I pizza not sure", "Table chair ice cream"  
- "that s one of my favorite songs by the time i make are" .

Examples of NOT gibberish:  
- "I am not sure this is not true"  
- "oh i get a similar band together and i love the same style of movies ."  
- "i thought i was gon na say that haha"

Choose

---

Does the conversation have a positive sentiment (e.g., joyful, optimistic, happy)? \*

Examples of a positive sentiment:  
- "i like the weather today"  
- "have a good day"

Explanation: Both of the sentences are cheerful and optimistic.

Examples of NOT positive sentiment:  
- "i hate it"  
- "i am tired and depressed"

Explanation: Both of the sentences are depressing.

Choose

Figure 6: Evaluation Template for Human Rater Experiment for Fluency and Sentiment Improvement

634 conversations. Consequently, a comprehensive evaluation of the MoE's potential utility in this context  
635 would benefit from investigating the impact of larger language models, which could provide further  
636 insights into the topic at hand. Yet, it is possible that when used maliciously, our proposed MoE-  
637 based dialogue management approach could be deployed to produce explicit or violent content (by  
638 exploiting ways to train experts with such dangerous behaviors), or to output fraudulent or plagiarized  
639 information. Finding principled ways to resolve these issues are key directions for future work.
